# Supplementary material for: Monitoring and assessing the impact of wastewater treatment on release of both antibiotic-resistant bacteria and their typical genes in a Chinese municipal wastewater treatment plant
Source: Royal Society of Chemistry journal article supplement (doi:10.1039/c4em00208c), 2014-01-01
Supplement: c4em00208c1.pdf [file c4em00208c1.pdf]

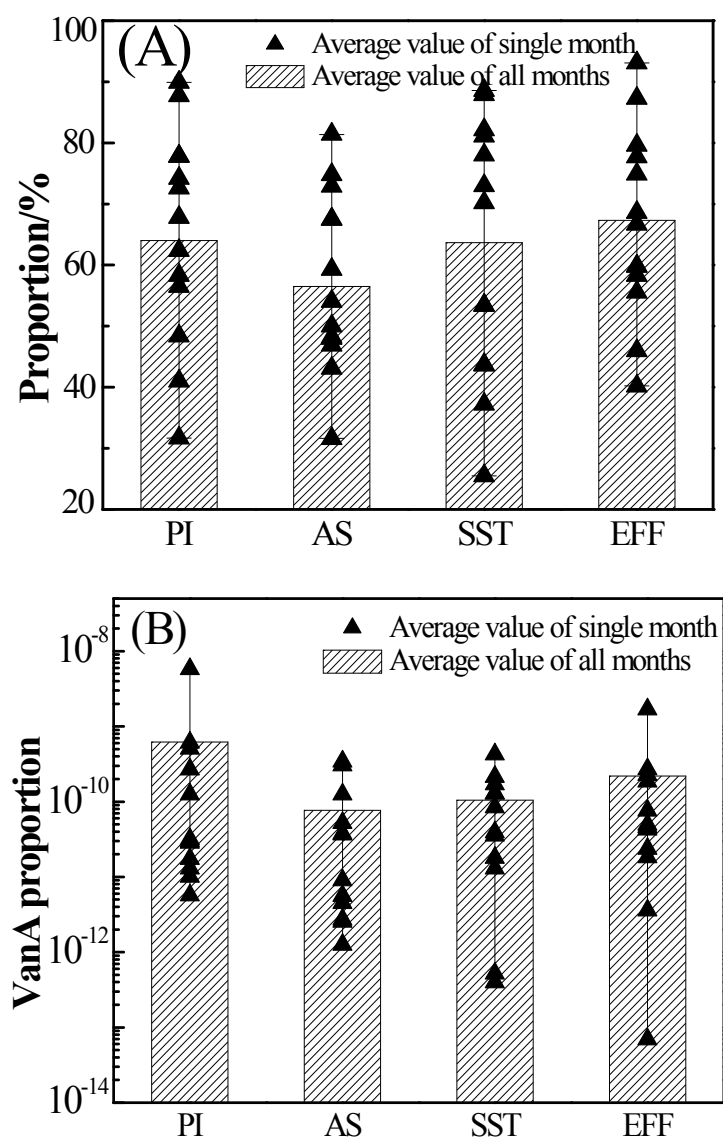

**Fig. S1** Average proportion of VAN- resistant bacteria (A) and vanA (B) in four sampling points during a whole year. PI, AS, SST and EFF represent raw sewage, activated sludge (after grit chamber), secondary sedimentation tank and effluent. No significant difference were detected of the average proportion of ARB or ARGs among the four sampling points. Similar result was also found on other ARB and corresponding ARGs.
