# Supplementary material for: Monitoring and assessing the impact of wastewater treatment on release of both antibiotic-resistant bacteria and their typical genes in a Chinese municipal wastewater treatment plant
Source: Royal Society of Chemistry journal article supplement (doi:10.1039/c4em00208c), 2014-01-01
Supplement: c4em00208c2.pdf [file c4em00208c2.pdf]

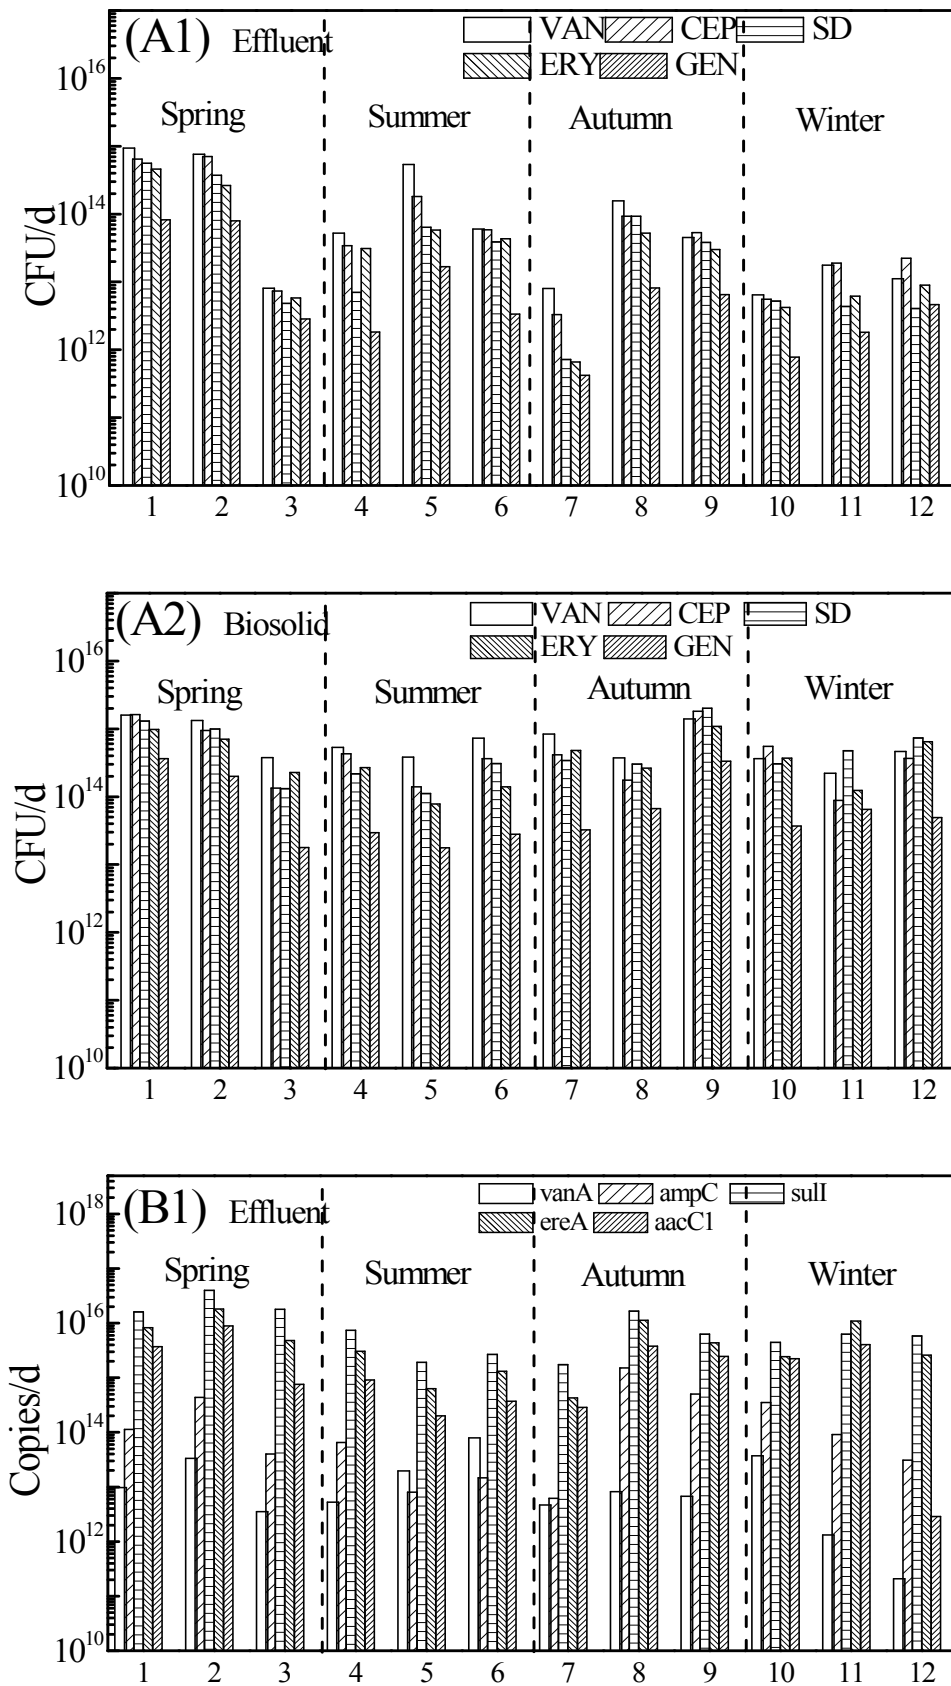

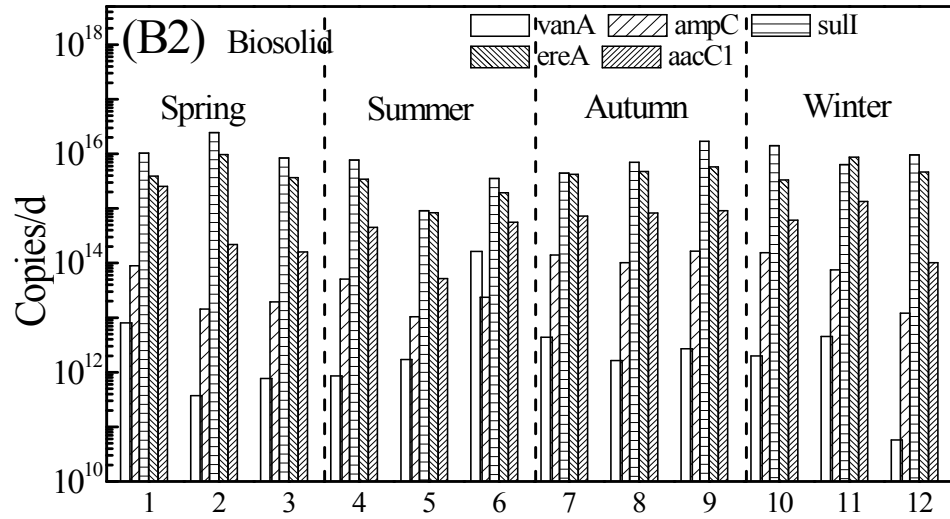

**Fig.S2** The release loads of five kinds of ARB (A1, A2) and ARGs (B1, B2) through the effluent and the biosolids over the whole year. The number in the abscissa represent the release load of ARB/ARGs in each month over the whole year.
